# Supplementary figures and images for: Biological Properties of 12 Newly Isolated Acinetobacter baumannii-Specific Bacteriophages
Source: MDPI journal article supplement (doi:10.3390/v15010231), 2023-01-13

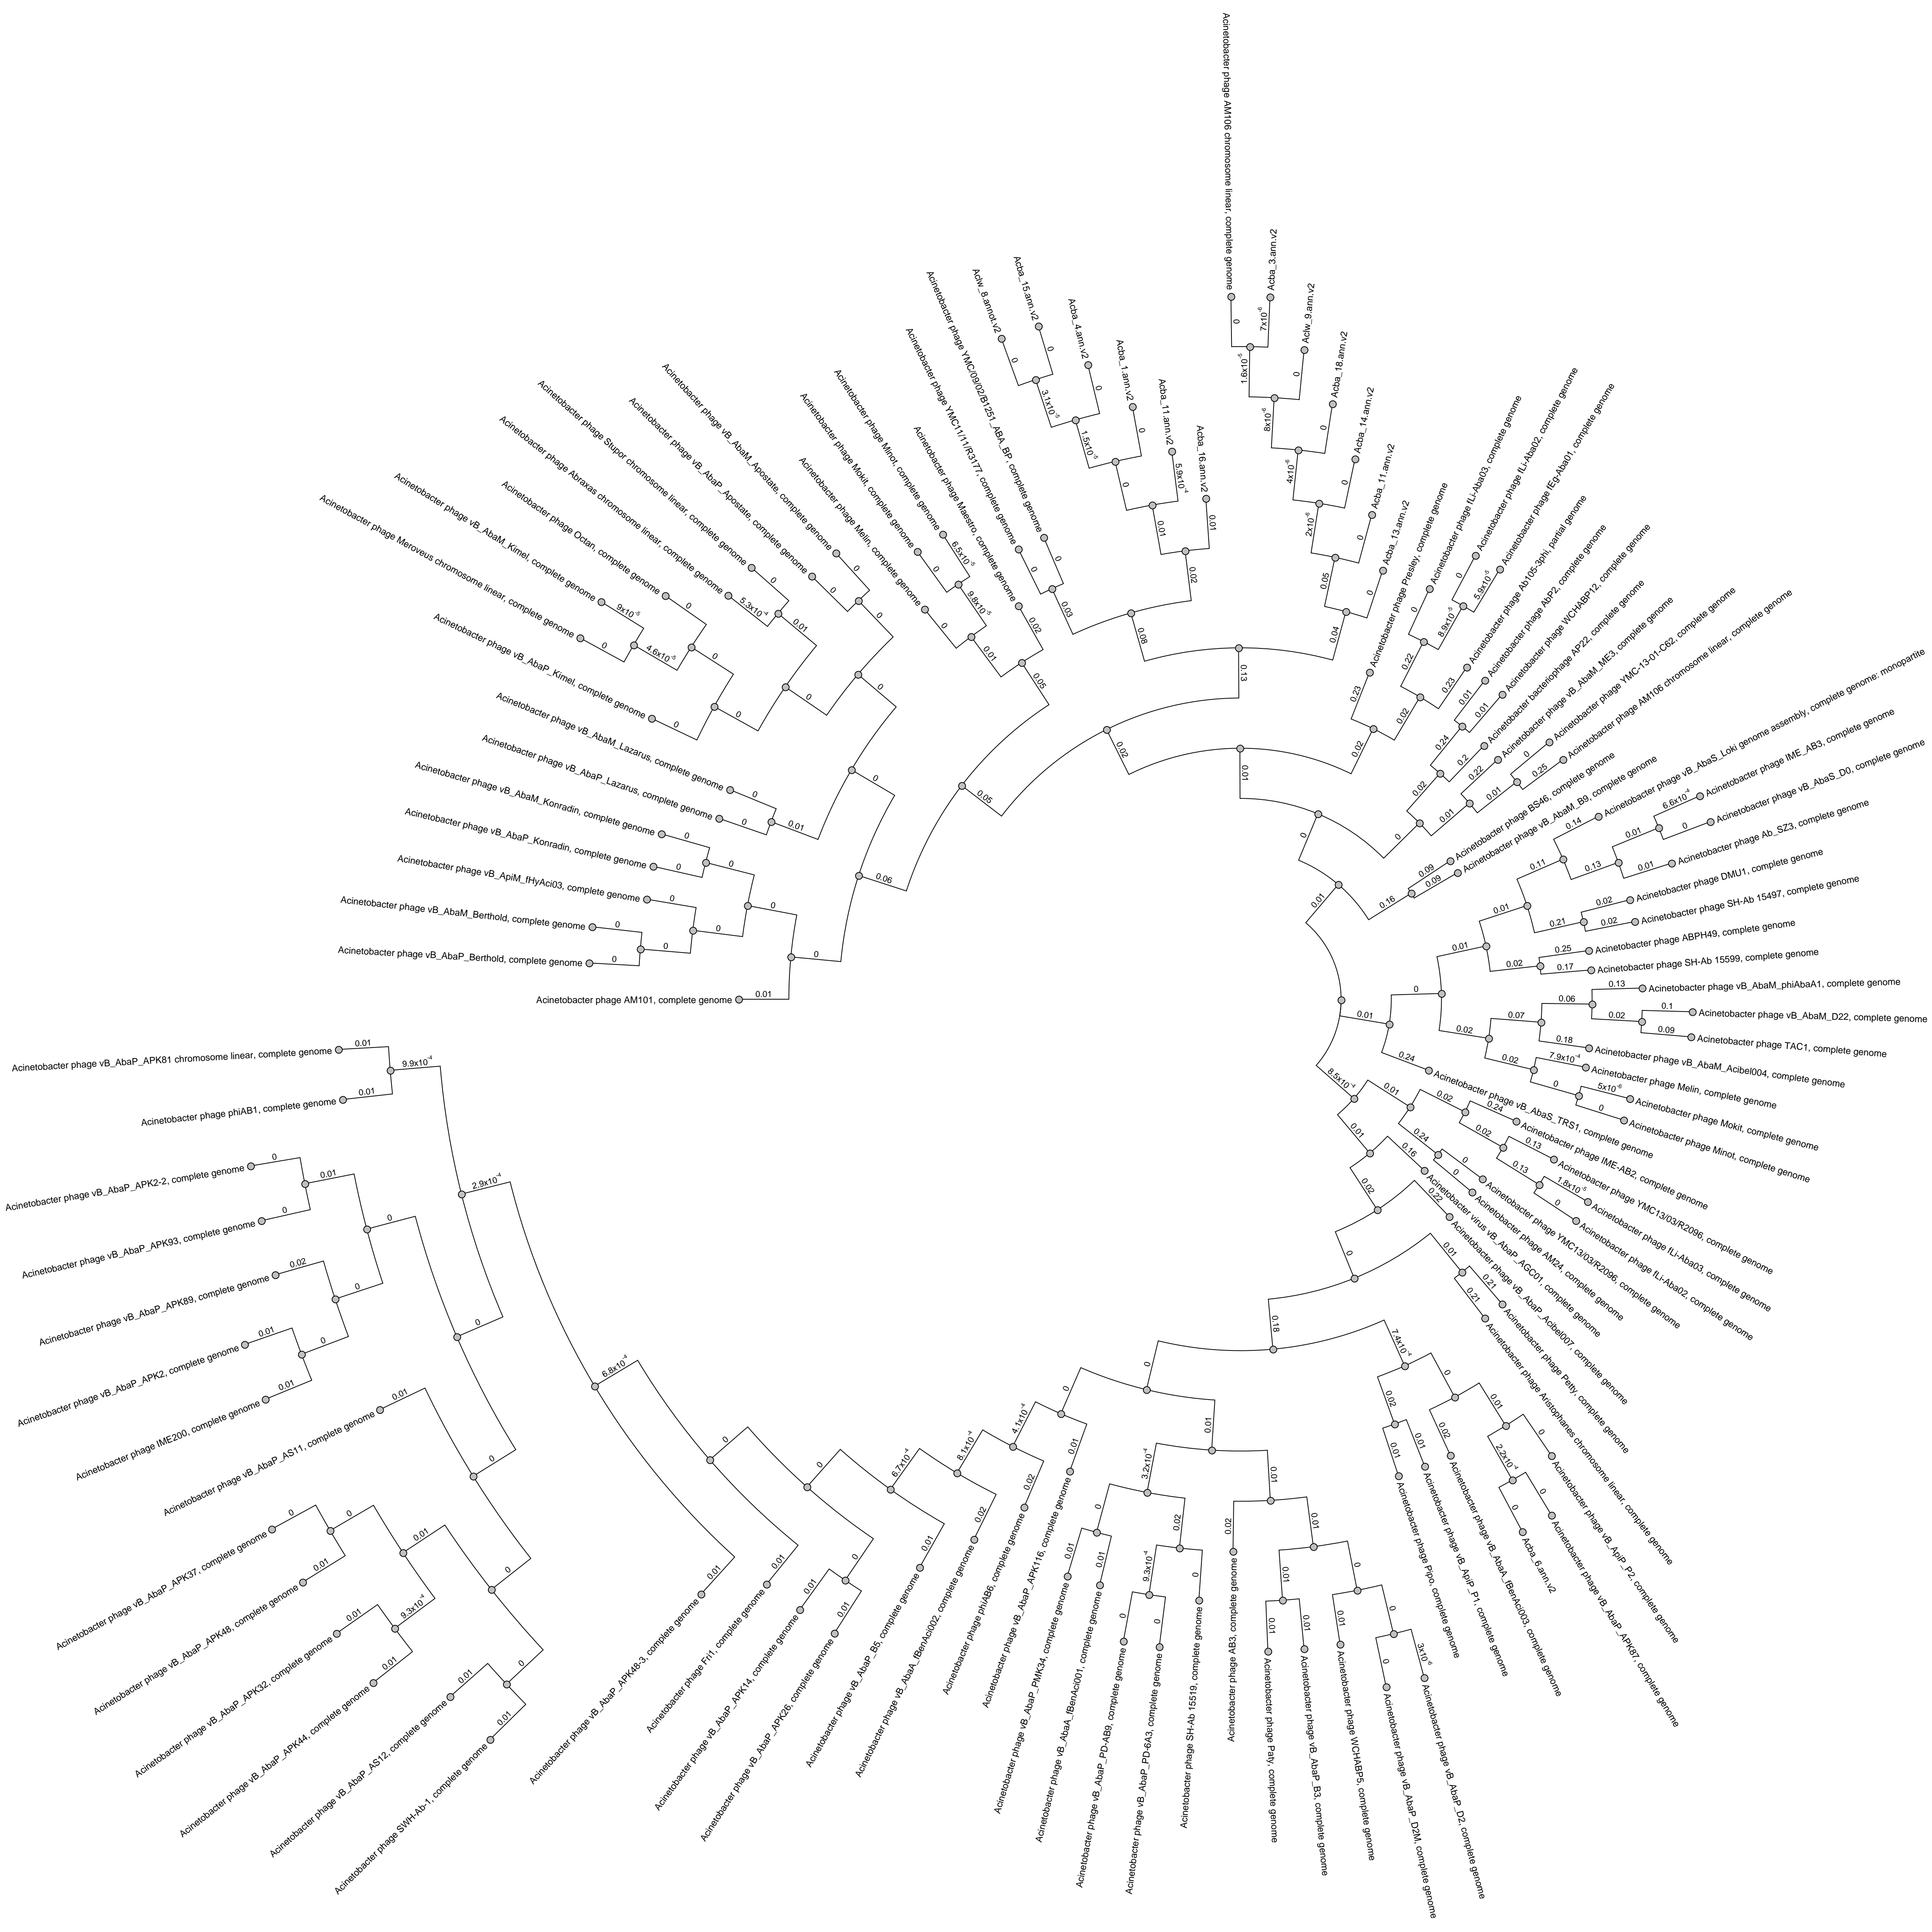

Supplement: s1 [file s1]
